# Supplementary material for: Barriers and facilitators to scaling up Healthy Choices, a motivational interviewing intervention for youth living with HIV
Source: Springer Nature journal article supplement (doi:10.1186/s12913-022-08453-w), 2022-08-29
Supplement: MOESM1 [file 23428922]

## SUPPLEMENT 1: COREQ 320 ITEM CHECKLIST

Tong A, Sainsbury P, Craig J. (2007) Consolidated criteria for reporting qualitative research (COREQ): a 32 item checklist for interviews and focus groups. *International Journal for Quality in Healthcare*: 19:349 – 357

| No. Item                                       | Guide questions/description                                         | Where Reported                 |
|------------------------------------------------|---------------------------------------------------------------------|--------------------------------|
| <b>Domain 1: Research team and reflexivity</b> |                                                                     |                                |
| 1. Interviewer/facilitator                     | Which author/s conducted the interview?                             | Method, p 5&6                  |
| 2. Credentials                                 | What were the researcher's credentials?                             | Title, Method p 6              |
| 3. Occupation                                  | What was their occupation at the time of the study?                 | Method, p6                     |
| 4. Gender                                      | Was the researcher male or female?                                  | Method, p5                     |
| 5. Experience and training                     | What experience or training did the researcher have?                | Method, p6                     |
| 6. Relationship with participants established  | Was a relationship established prior to study commencement?         | Method, p6                     |
| 7. Participant knowledge of the interviewer    | What did the participants know about the researcher?                | Method p5&6                    |
| 8. Interviewer characteristics                 | What characteristics were reported about the interviewer?           | Method, p5                     |
| <b>Domain 2: study design</b>                  |                                                                     |                                |
| 9. Methodological orientation and Theory       | What methodological orientation was stated to underpin the study?   | Introduction p3,4; Method p5-6 |
| 10. Sampling                                   | How were participants selected?                                     | Method p4                      |
| 11. Method of approach                         | How were participants approached?                                   | Method p5                      |
| 12. Sample size                                | How many participants were in the study?                            | Results p7                     |
| 13. Non-participation                          | How many people refused to participate or dropped out? Reasons?     | N/A                            |
| 14. Setting of data collection                 | Where was the data collected?                                       | Method p6                      |
| 15. Presence of non-participants               | Was anyone else present besides the participants and researchers?   | N/A                            |
| 16. Description of sample                      | What are the important characteristics of the sample?               | Method p4; Results p7          |
| 17. Interview guide                            | Were questions, prompts, guides provided by the authors?            | Method p6; Supp 1              |
| 18. Repeat interviews                          | Were repeat interviews carried out?                                 | Results p7                     |
| 19. Audio/visual recording                     | Did the research use audio or visual recording to collect the data? | Results p6                     |
| 20. Field notes                                | Were field notes made during the                                    | Method p6                      |

|                                        |                                                                                                         |              |
|----------------------------------------|---------------------------------------------------------------------------------------------------------|--------------|
|                                        | interview?                                                                                              |              |
| 21. Duration                           | What was the duration of the interviews                                                                 | Method p6    |
| 22. Data saturation                    | Was data saturation discussed?                                                                          | No           |
| 23. Transcripts returned               | Were transcripts returned to participants for comment and/or correction?                                | No           |
| <b>Domain 3: analysis and findings</b> |                                                                                                         |              |
| 24. Number of data coders              | How many data coders coded the data?                                                                    | Method p6    |
| 25. Description of the coding tree     | Did authors provide a description of the coding tree?                                                   | Figure 1     |
| 26. Derivation of themes               | Were themes identified in advance or derived from the data?                                             | Results p7   |
| 27. Software                           | What software, if applicable, was used to manage the data?                                              | Method p6    |
| 28. Participant checking               | Did participants provide feedback on the findings?                                                      | No           |
| 29. Quotations presented               | Were participant quotations presented to illustrate the themes/findings? Was each quotation identified? | Results 7-13 |
| 30. Data and findings consistent       | Was there consistency between the data presented and the findings?                                      | Results 7-13 |
| 31. Clarity of major themes            | Were major themes clearly presented in the findings?                                                    | Results 7-13 |
| 32. Clarity of minor themes            | Is there a description of diverse cases or discussion of minor themes?                                  | Results 7-13 |
